# Supplementary material for: Identifying the Trends of Urinary microRNAs within Extracellular Vesicles for Esophageal Cancer
Source: MDPI journal article supplement (doi:10.3390/cancers16091698), 2024-04-27

## Supplemental Figure

**Supplemental Figure S1.** Trends of microRNAs during multidisciplinary treatment: Case 1.

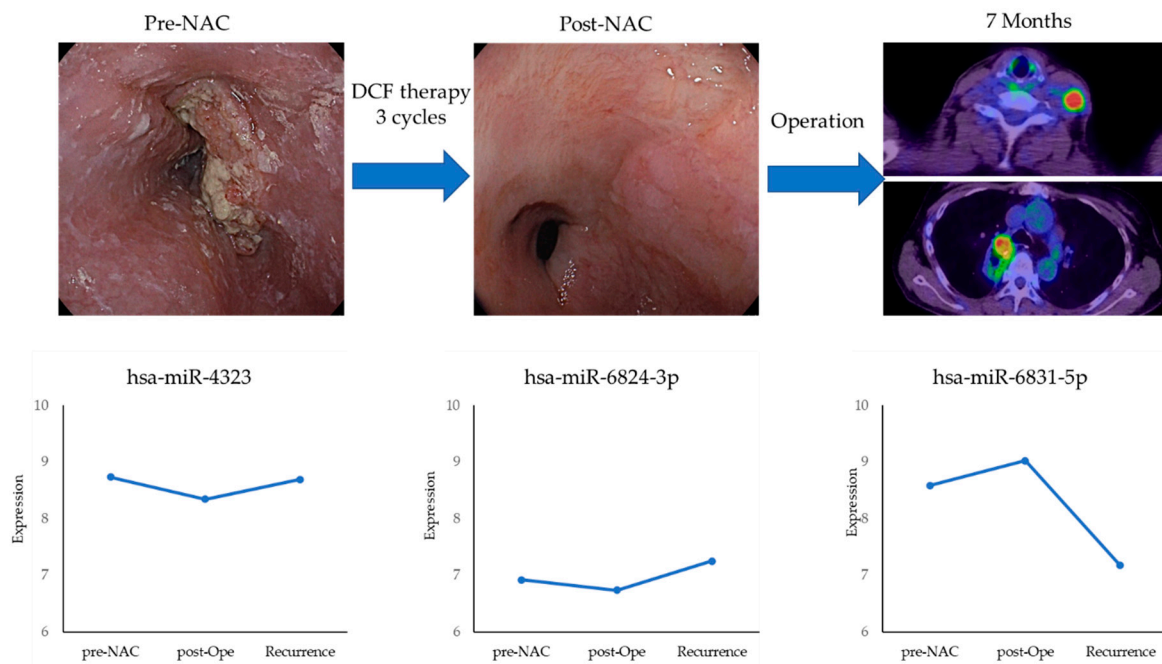

**Supplemental Figure S2.** Trends of microRNAs during multidisciplinary treatment: Case 2

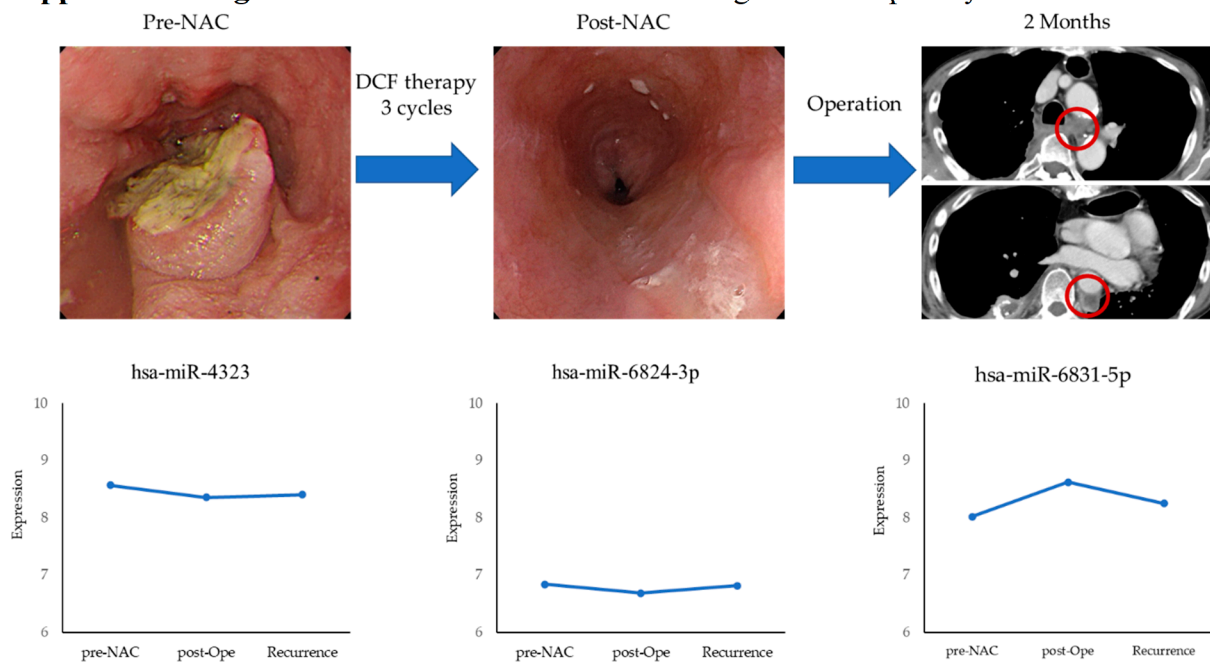

## Supplemental Figure S3. Longitudinal Changes in microRNAs in recurrence case 1

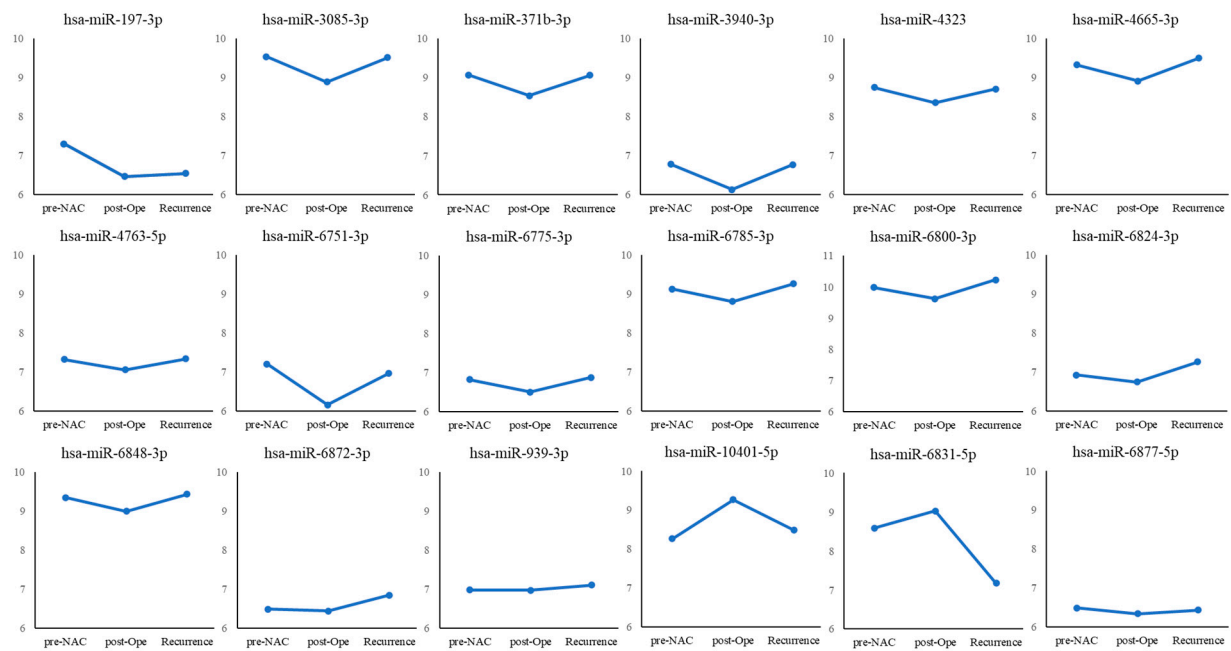

## Supplemental Figure S4. Longitudinal Changes in microRNAs in recurrence case 2

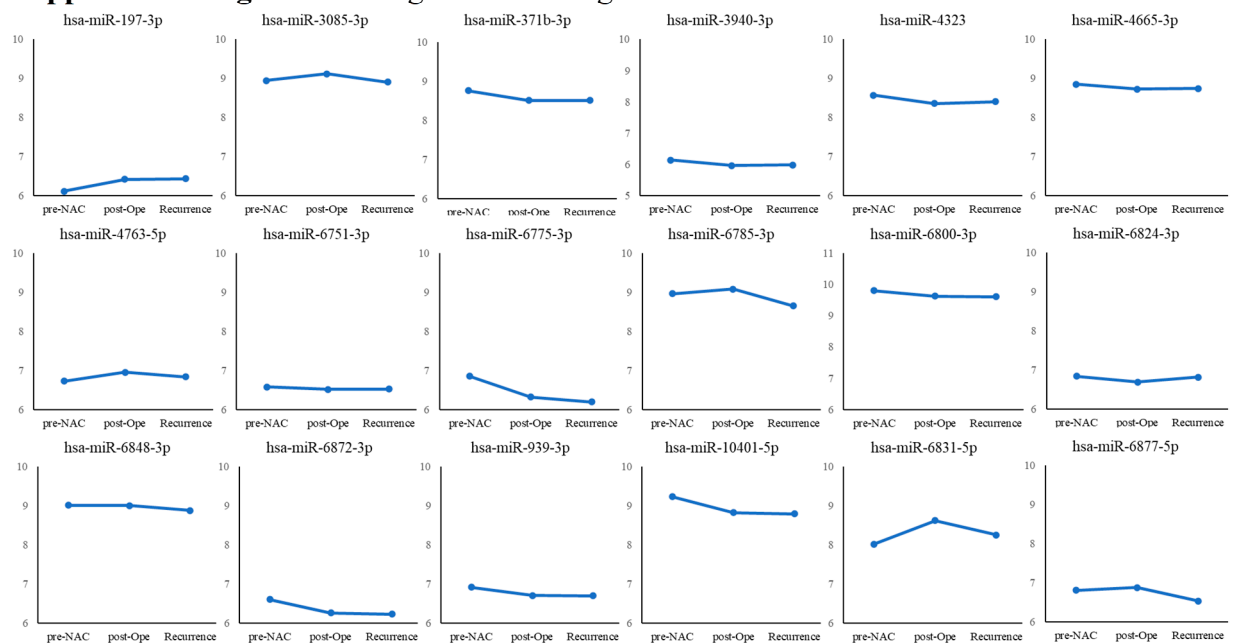

Supplement: s1 [file s1]
